# Supplementary material for: Population structure of the shallow coral Madracis auretenra in the Caribbean Sea
Source: Frontiers journal article supplement (doi:10.3389/fmars.2022.840730), 2022-10-04

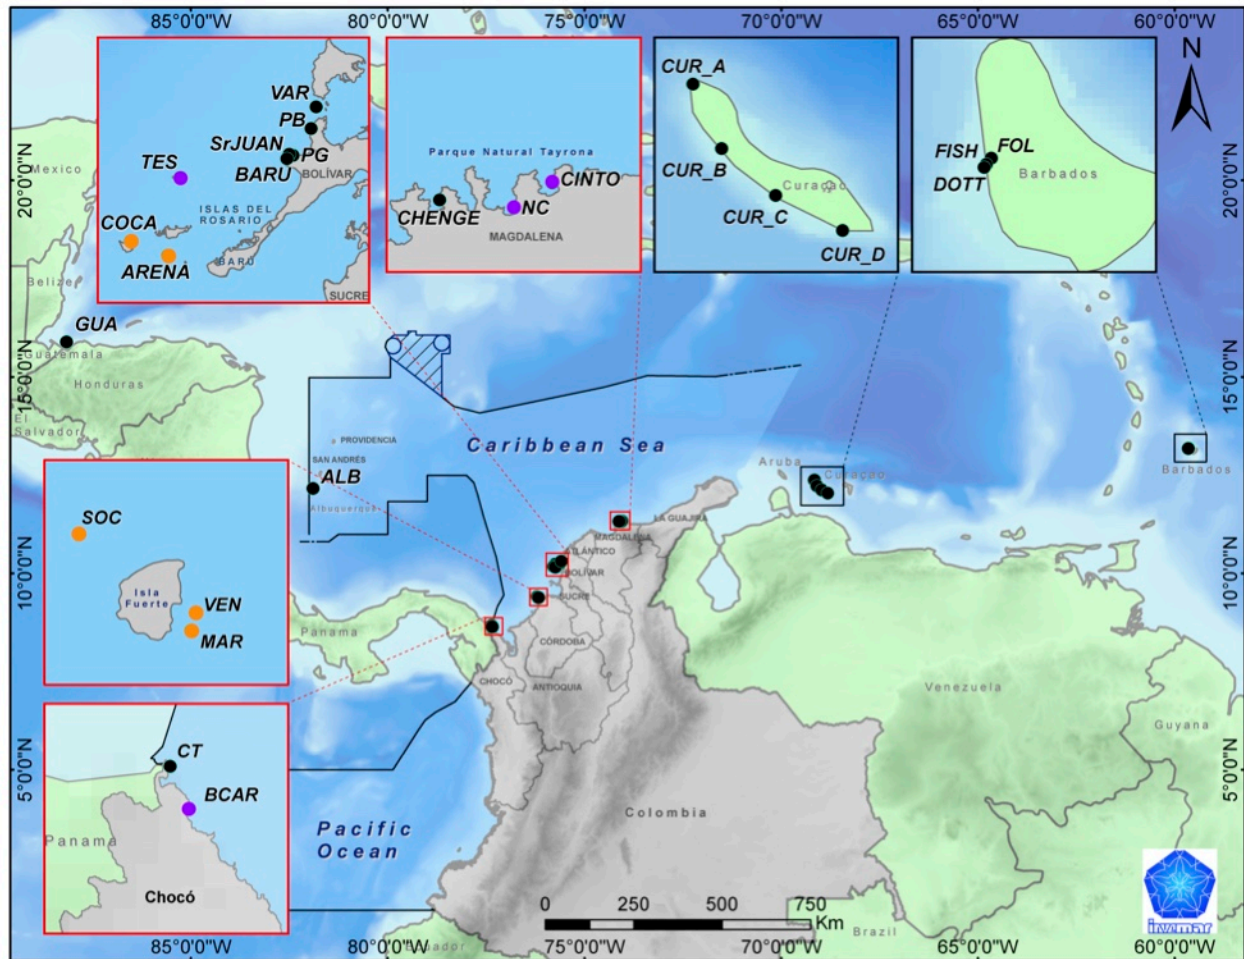

**Supplementary Figure 1a.** Sampling localities of *M. auretenra* in the Caribbean Sea. Red squares show a close up of the samples from Colombia. Black squares show a close up of the samples in Curacao and Barbados. Localities with less than 10 samples are represented in purple dots. Orange localities are grouped in areas below of 2.5km<sup>2</sup> of distance: Isla Rosario (COCA and ARENA grouped) and Isla Fuerte (SOC, VEN and VEN grouped).

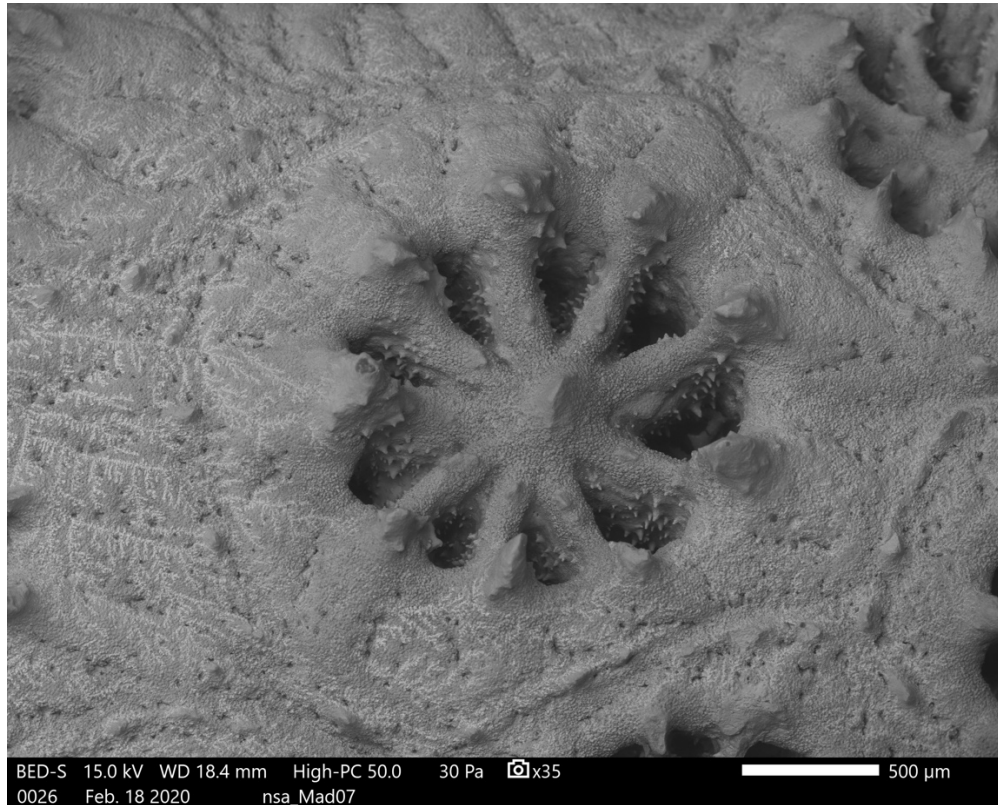

**Supplementary Figure 2a.** Samples of *Madracis auretenra* from Curacao under electron microscopy-SEM (Zeiss Supra 40VP FE-SEM).

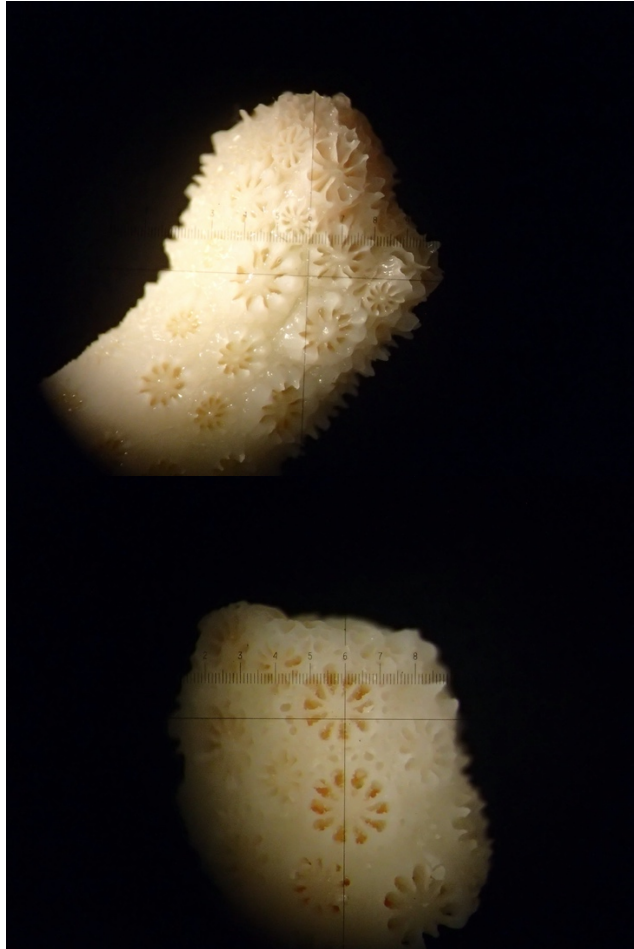

**Supplementary Figure 2b.** detail of calyxes in sample of *Madracis auretenra* from Curacao under stereoscope-Zeiss Stemi 305. The scales are presented in millimeters.

### Supplementary Figure 2c.

Thirteen samples (6, 3, 2 and 2 samples from Colombia, Curacao, Barbados and Guatemala, respectively) were amplified using COX1, primers LCO1 490 5' - GGTCAACAAATCATAAAGATATTGG and HCO2 198 5' - TAAACTTCAGGGTGACCAAAAAATCA (Folmer et al., 1994) and 28s, primers 28S.F63sq 5'- AATAAGCGGAGGAAAAGAAAC and 28S.R635sq 5'-GGTCCGTGTTTCAAGACGG (Stolarski et al., 2011). The reactions were carried out in 10µl, with 1µl of DNA diluted at 20µM in Buffer AE (QIAGEN DNeasy Blood & Tissue kit), 5µL MyTaq Red Mix de Bioline, 0,2µL of each primer, 3,6µL of molecular grade. The PCR conditions for COX1 were 95°C for 1 min, then 35 cycles of 30 s at 95°C, 30 s at 40°C, and 90 s at 72° C, followed by 10 min at 72°C; and PCR conditions for 28s were 95°C for 5 min, then 30 cycles of 30 s at 94°C, 60 s at 54°C, 90 s at 72°C, followed by 5 min at 72°C. the samples were sent to the Core Genomics Facility at the University of Sheffield, previously cleaned using the ExoProStar 1 step Kit from Fisher-Scientific. the amplification of the samples was matched with sequences of *M. auretenra* (95,43 - 99.85% similarity) in NCBI database.



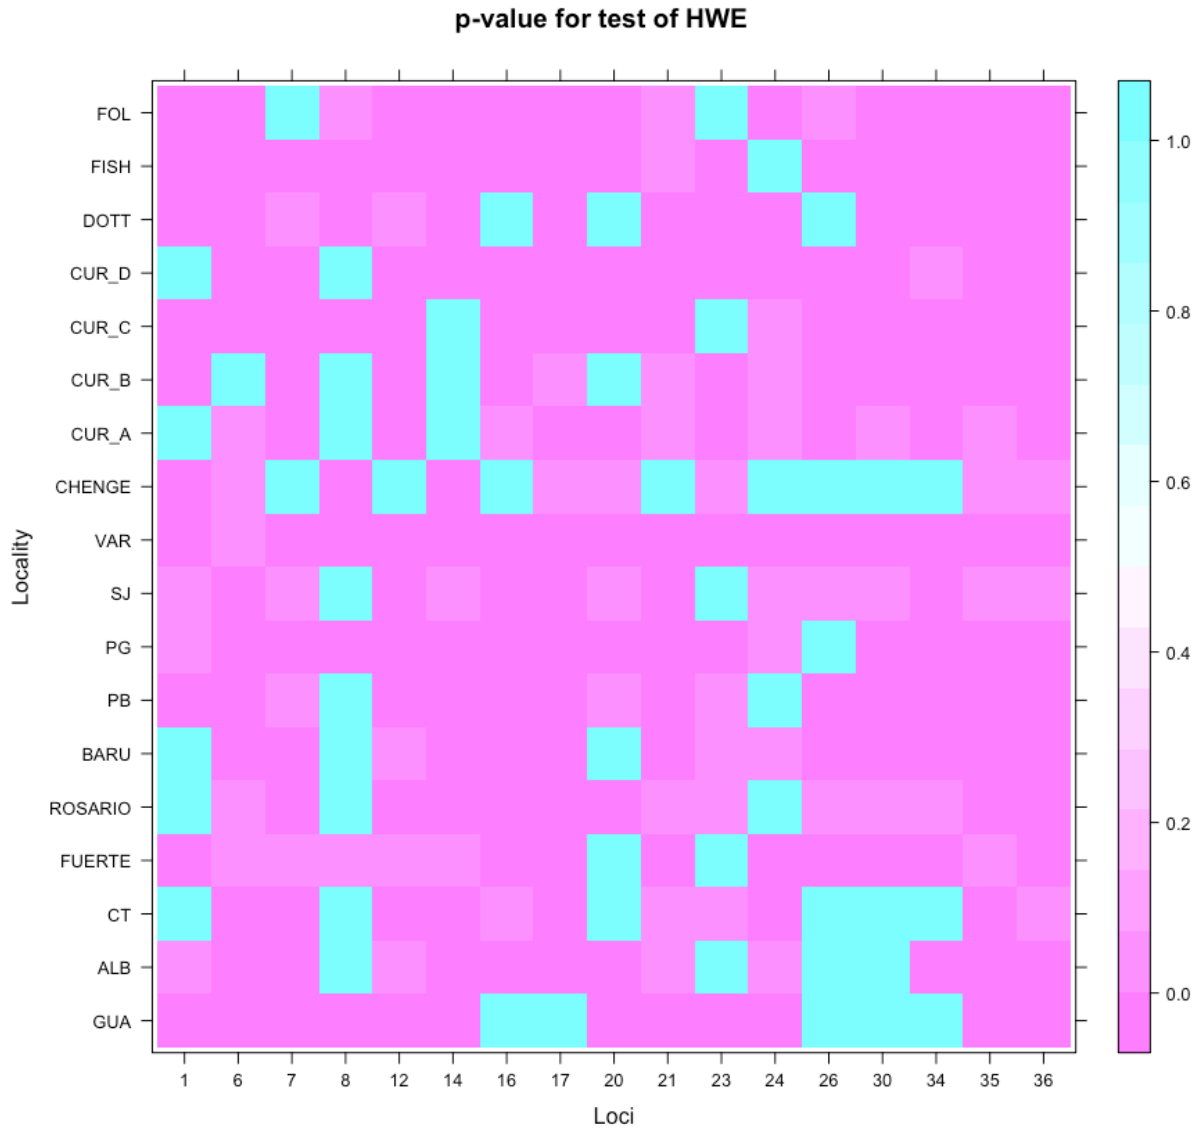

**Supplementary Figure 2d.** Probability of deviation from Hardy Weinberg Equilibrium (HWE) deviation for each locality. Localities with  $p < 0.05$  are in pink and localities with  $p > 0.05$  are in blue colours.

**Supplementary Figure 3a.** DeltaK. Values obtained using STRUCTURE HARVESTER, after a 20 runs per K in Structure.

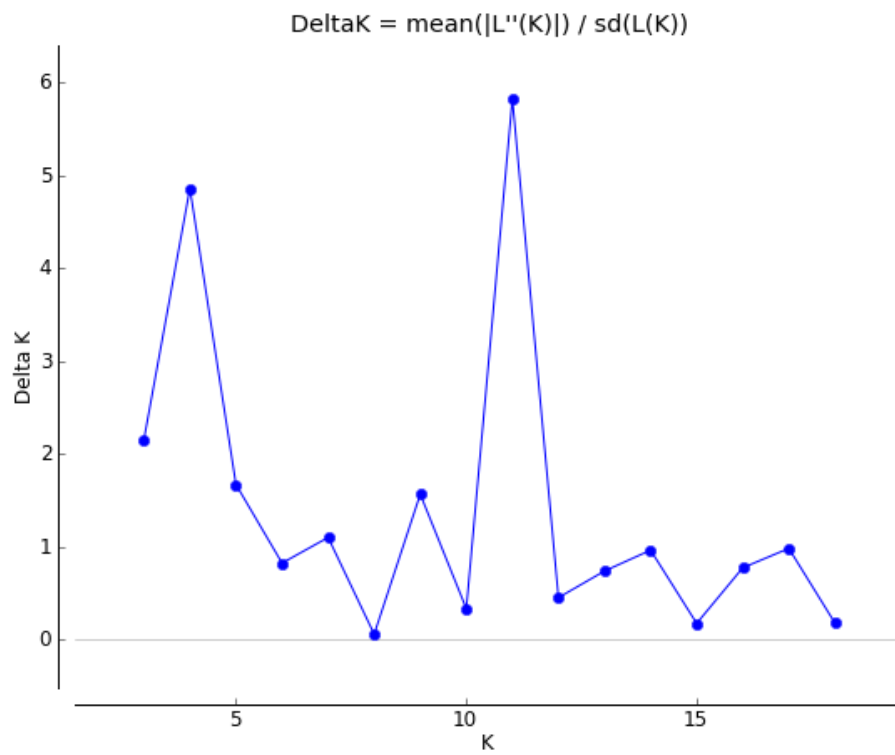

**Supplementary Figure 3b.** Individual genotype assignment for *M. auretenra* to clusters (K) as inferred by STRUCTURE for all studied sites with K= 9

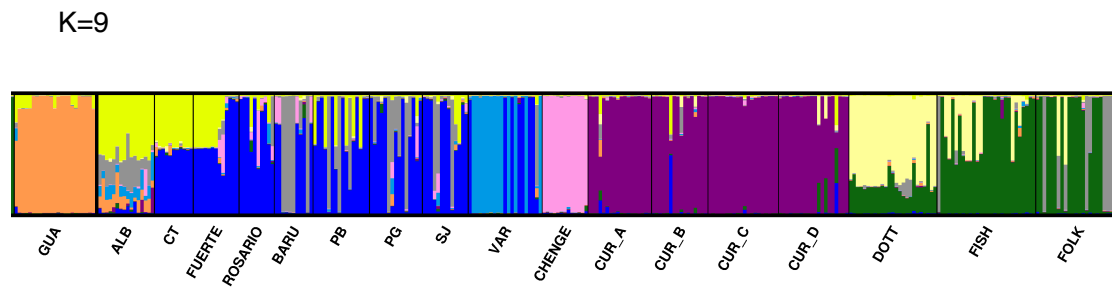

**Supplementary Figure 3c.** Individual genotype assignment for *M. auretenra* to clusters (K) as inferred by STRUCTURE for all studied sites with K= 7

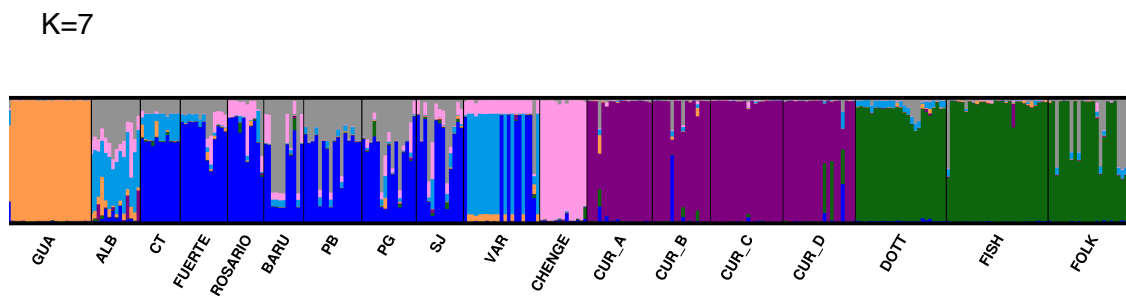

**Supplementary Figure 4a.** DAPC using the first two principal components by Country

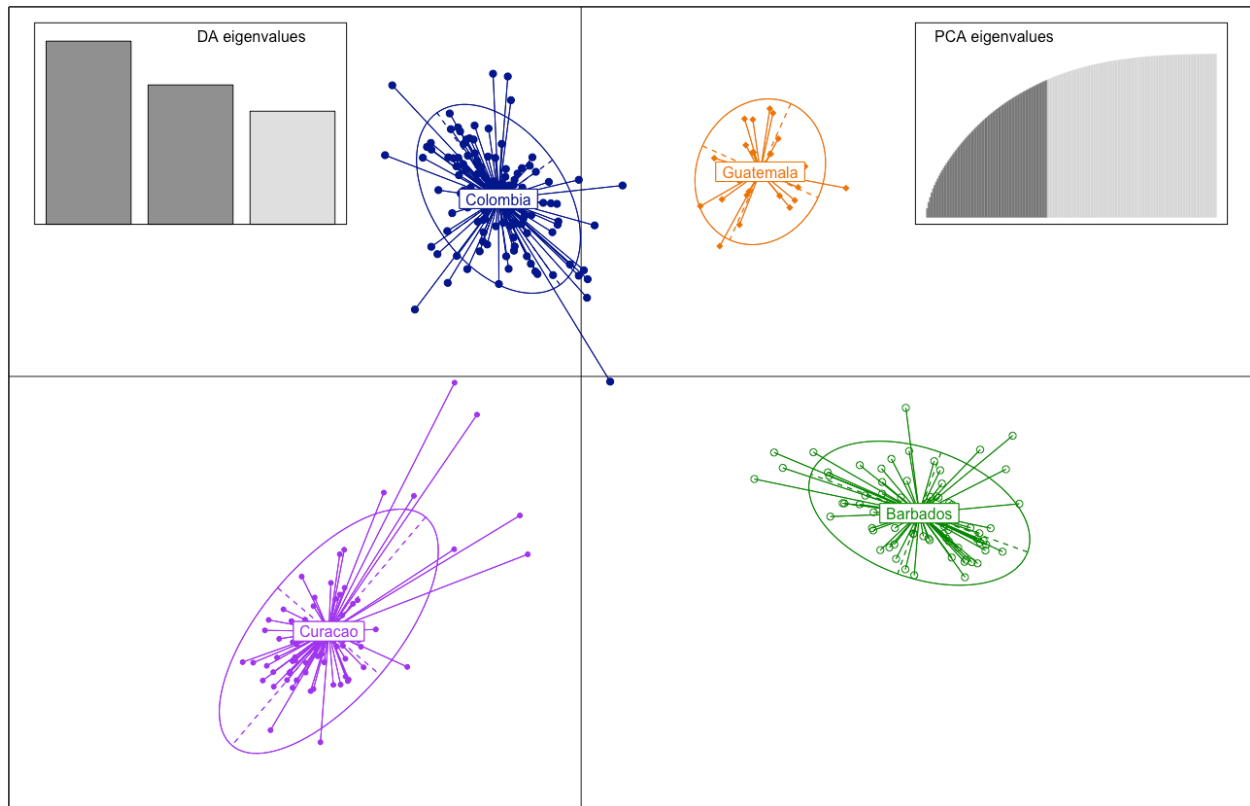

**Supplementary Figure 4b.** DAPC using the first two principal components by Department.

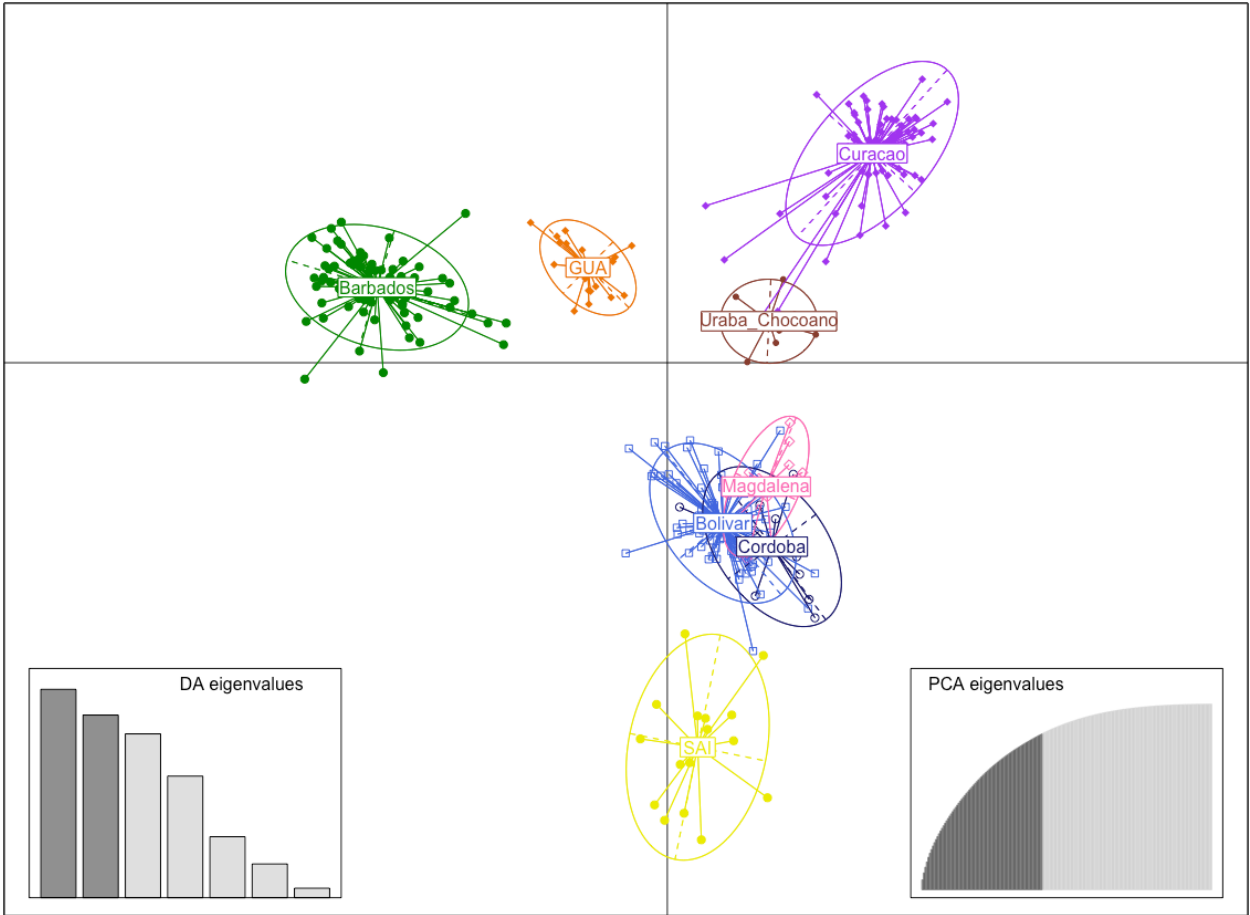

Supplementary Figure 4c. DAPC using the first two principal components in Colombia.

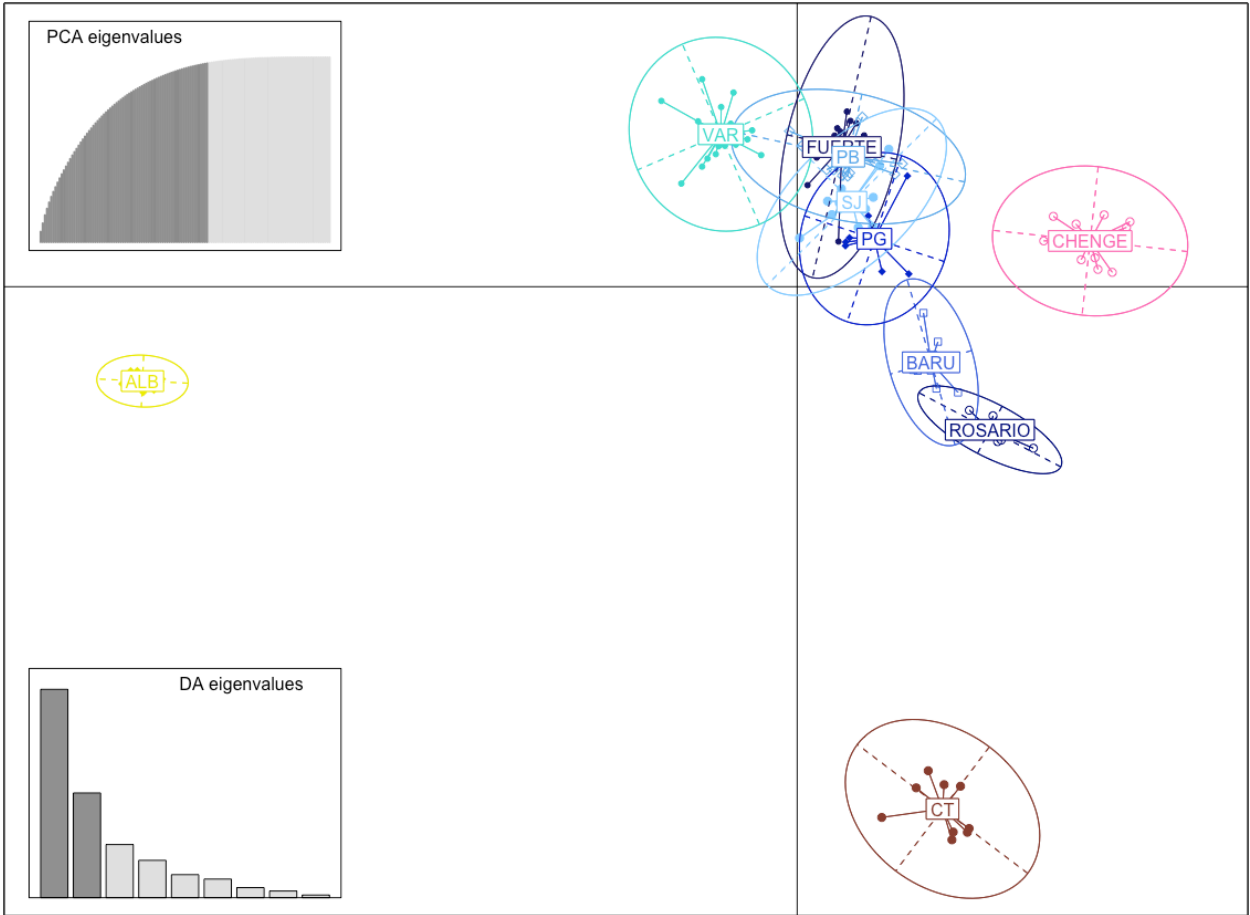



**Supplementary Figure 5a.** PCoA (Principal Coordinate Analysis) using the first two principal components by Department

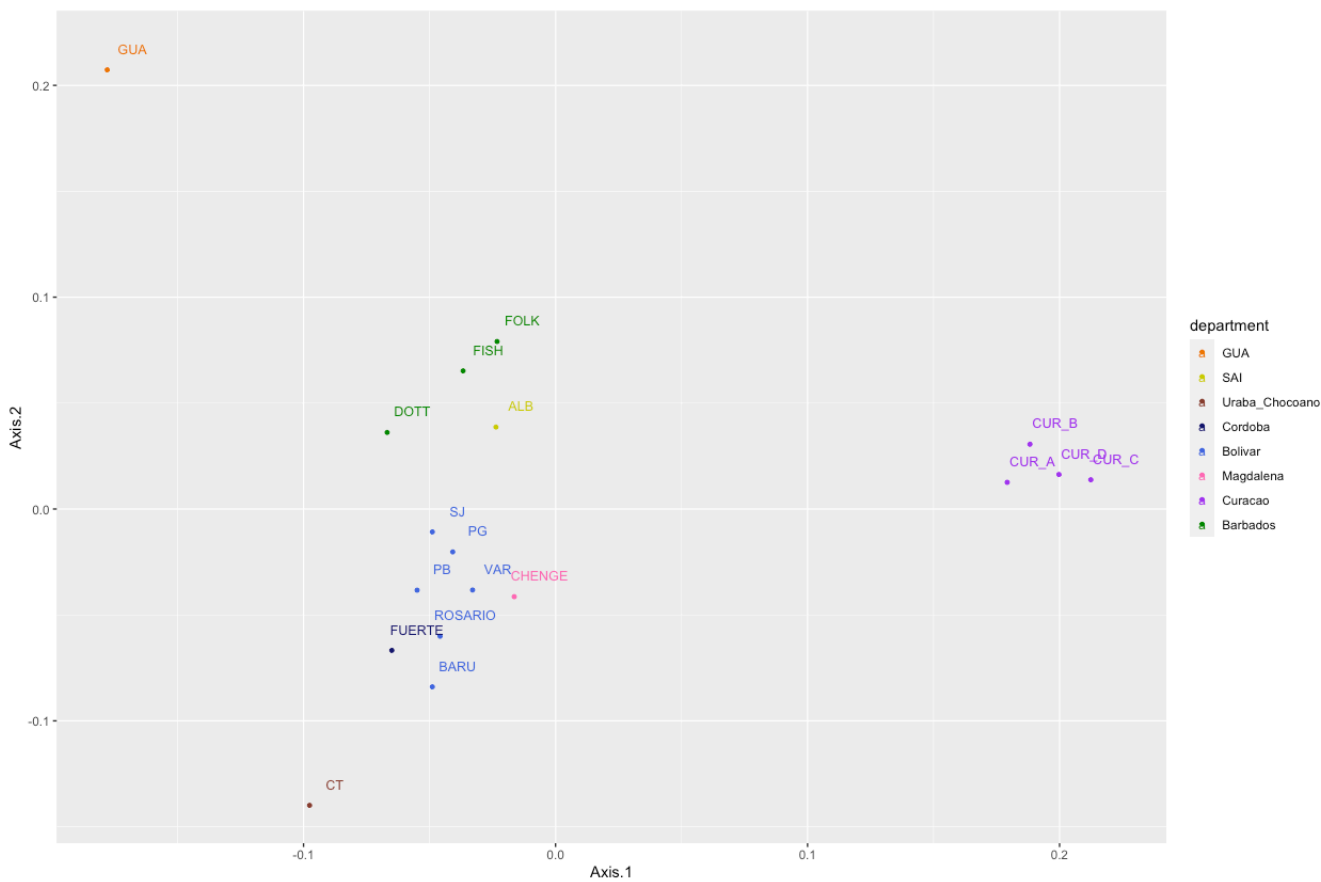

Supplementary Figure 5b. PCA by department

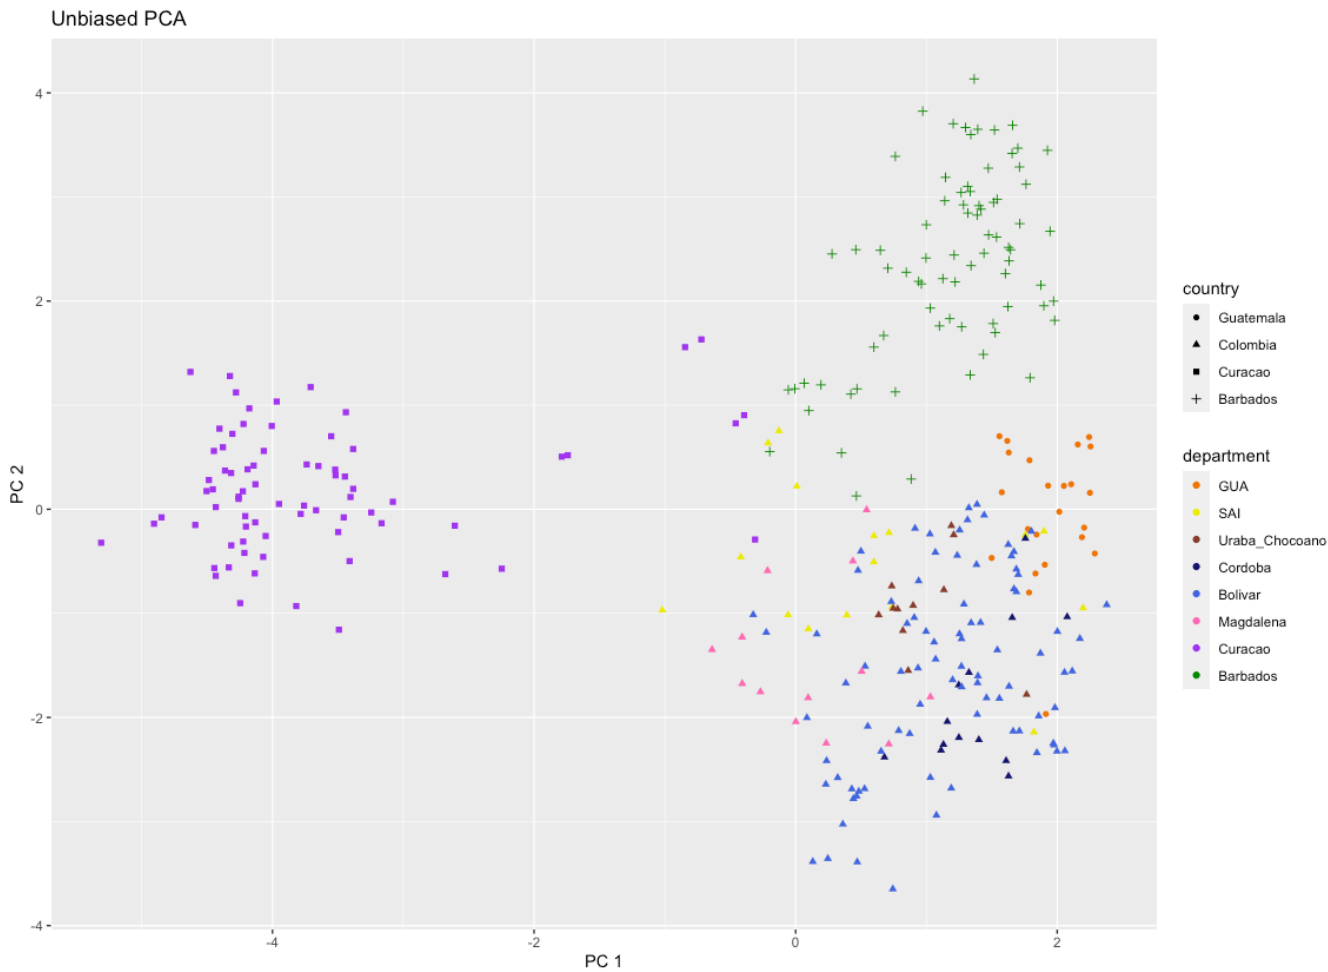

Supplementary Figure 5c. PCA by localities in Colombia

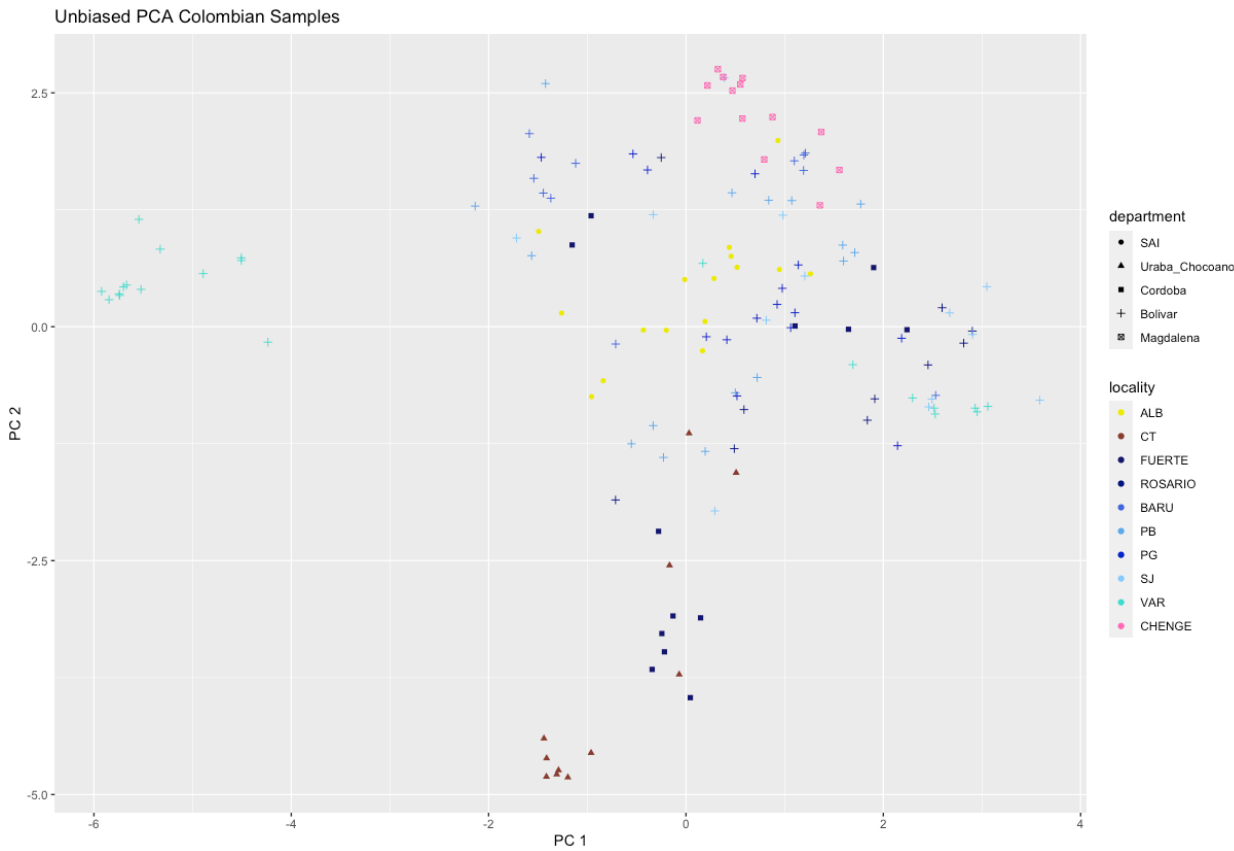

**Supplementary Figure 6a.** Genetic isolation by distance using pairwise calculations  $F_{st}$  and oceanographic distance.

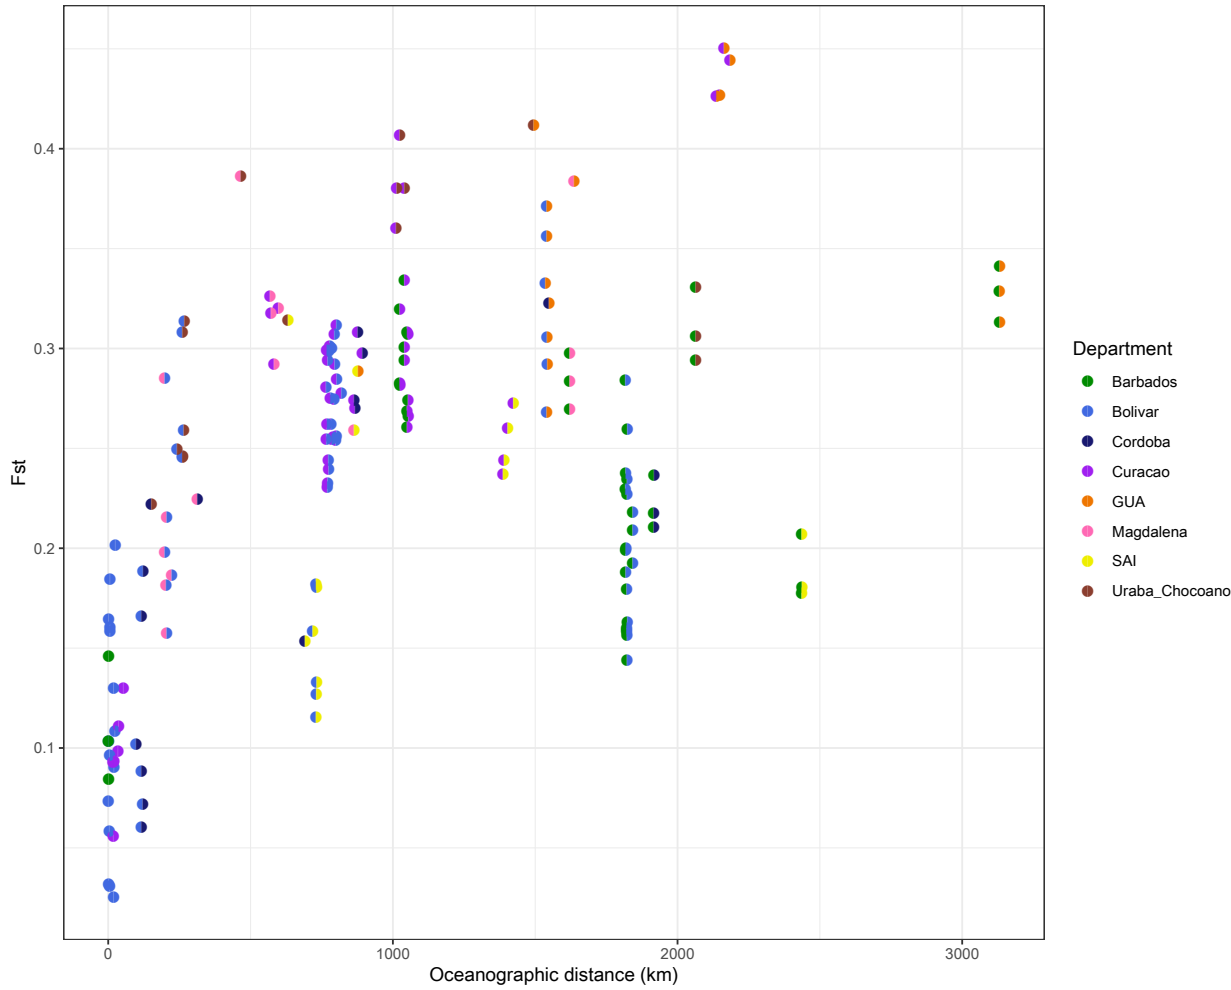

**Supplementary Figure 7a.** Population assignment showing the percentage of the population per locality

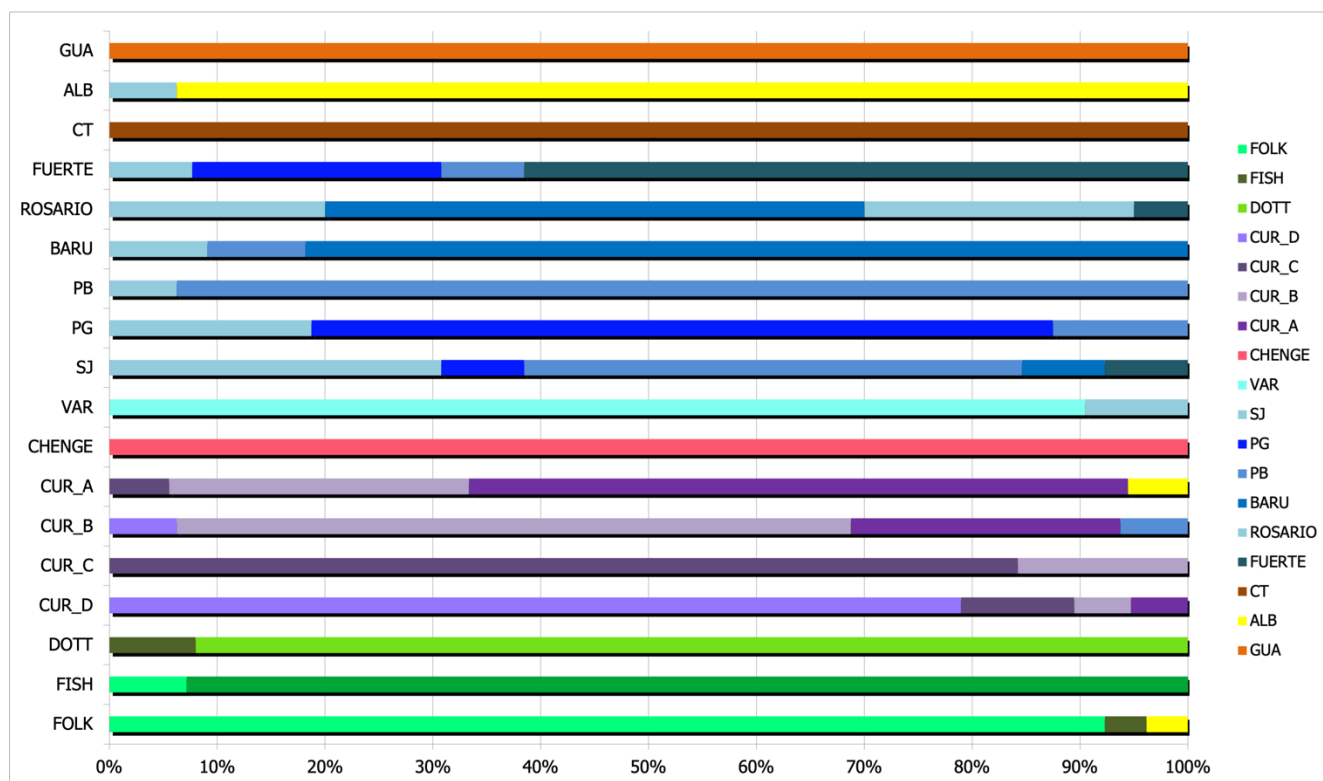

Supplement: Data_Sheet_1.PDF [file Data_Sheet_1.PDF]
